# Supplementary material for: Gender differences for frailty in HIV-infected patients on stable antiretroviral therapy and with an undetectable viral load
Source: PLoS One. 2019 May 9;14(5):e0215764. doi: 10.1371/journal.pone.0215764 (PMC6508723; doi:10.1371/journal.pone.0215764)
Supplement: S1 File — (PDF) [file pone.0215764.s001.pdf]

Número:.....

**Demográficos:**

- Fecha nacimiento: .....
- Fecha inclusión del paciente en el estudio: .....
- Edad autopercebida (en años): .....
- Sexo: Hombre ☐ Mujer ☐
- Raza/etnia: Caucásica ☐ Latinoamericana ☐ Subsahariana ☐  
Norte Africano ☐ Otros ☐
- Lugar de residencia: Urbano (Logroño, Calahorra, Arnedo, Haro) ☐ Rural ☐ [<10.000 hab.]
- Nivel cultural (auto-reportado): Sin estudios ☐ Primaria completa ☐  
Secundaria completa ☐ Universitario ☐
- Situación laboral (auto-reportado): Estudiante ☐ Trabajador activo ☐  
Desempleado ☐ Pensionista ☐
- Situación personal (auto-reportado): Vive sólo ☐ En familia ☐ Con amigos ☐
- Estatus marital (auto-reportado): Soltero/a ☐ Casado/a ☐ En pareja ☐  
Separado/a ☐ Viudo/a ☐

**Estilo de vida (auto-reportado) y calidad de vida:**

- Consumo de alcohol diario: Abstemio ☐ Leve <3/sem ☐ Moderado 3-13/sem ☐ Severo >14/sem ☐
- Tabaquismo: Nunca ☐ Exfumador [no fuma desde hace >6] ☐ Fumador ☐
- Actividad física recomendada por la OMS (en 18-64 años,  $\geq 150$  min/sem en una práctica aeróbica de intensidad moderada, o  $\geq 75$  min/sem de actividad física vigorosa, o bien una combinación equivalente de actividades moderadas y vigorosas): Si ☐ No ☐
- Consumo marihuana: Si ☐ No ☐
- Calidad de vida (MOS-VIH) (en español) <https://eprovide.mapi-trust.org/instruments/medical-outcome-study-hiv-health-survey>
- EQ-5D (en español) <https://euroqol.org>

### Variables relacionadas con la presencia de comorbilidades:

- Índice comorbilidad Charlson (<https://www.mdcalc.com/charlson-comorbidity-index-cci>) e índice VACS (<https://www.mdcalc.com/veterans-aging-cohort-study-vacs-index>)
- Comorbilidades
  - cardiovascular (HTA, claudicación, ACV, insuficiencia cardíaca congestiva, angina de pecho, IAM) Si ☐ No ☐
  - digestivas (cirrosis hepática) Si ☐ No ☐
  - endocrinológicas (diabetes mellitus, obesidad, dislipemia, síndrome metabólico) Si ☐ No ☐
  - respiratorias (EPOC) Si ☐ No ☐
  - osteo-articulares (osteoporosis, fractura previa) Si ☐ No ☐
  - neuro-psiquiátricas (demencia, depresión, ansiedad, trastorno bipolar, esquizofrenia) Si ☐ No ☐
  - nefrológicos (insuficiencia renal crónica) Si ☐ No ☐
- Multimorbilidad (presencia de >2 comorbilidades) Si ☐ No ☐
- Polifarmacia (>5 fármacos no relacionados con el VIH) Si ☐ No ☐
- Número de fármacos para el VIH: .....
- Toma específica de algunos de estos tratamiento
  - AAS Si ☐ No ☐
  - Beta-bloqueantes Si ☐ No ☐
  - Diuréticos Si ☐ No ☐
  - IECA Si ☐ No ☐
  - ARA-II Si ☐ No ☐
  - Suplementos tiroideos Si ☐ No ☐
  - Estatinas Si ☐ No ☐
  - AINES Si ☐ No ☐
  - Antidepresivos Si ☐ No ☐
  - Anticolinérgicos Si ☐ No ☐
- Hospitalización el año previo por cualquier motivo: Si ☐ No ☐
- Autopercepción de su estado de salud: Excelente ☐ Muy buena ☐ Buena ☐ Regular ☐ Mala ☐
- Caídas por cualquier motivo el año previo Si ☐ No ☐
- Déficit neurossensorial (problemas de audición y/o que requieren audífono, y/o pacientes con dificultad para ver a pesar de llevar gafas): Si ☐ No ☐

- En las mujeres: - Embarazo previos Si ☐ No ☐
  - Número de embarazos .....
  - Menopausia (ausencia de regla >6 meses) Si ☐ No ☐
- A nivel familiar (familiares de primer grado): - Antecedente de IAM (en <60 años) Si ☐ No ☐
  - Hipertensión Si ☐ No ☐
  - Diabetes mellitus tipo 2 Si ☐ No ☐
  - Hipercolesterolemia Si ☐ No ☐

#### **Relacionados con la infección por el VIH y otras coinfecciones:**

- Fecha de diagnóstico VIH .....
- Vía de adquisición: Hetero ☐ HSH ☐ UDVP ☐ Otros ☐
- Fecha de inicio del TAR .....
- TAR actual: .....
- TAR previos empleados: NRTI ☐ NNRTI ☐ IPs ☐ INSTI ☐ Otros ☐
- Nadir de CD4:.....
- Evento sida previo: Si ☐ No ☐
- Lipoatrofia: Si ☐ No ☐
- Lipoacumulación: Si ☐ No ☐
- Coinfección VHB (HBsAg+) Si ☐ No ☐
- Coinfección VHC (ARN+): No ☐ Previa (curada) ☐ Activa ☐
- Adherencia al tratamiento (autoreportado): <85% ☐ 85-99% ☐ 100% ☐

#### **Otros**

- Velocidad de deambulaci3n (4 m).....
- Peso ..... Talla .....
- Circunferencia de la cintura ..... Circunferencia de la cadera .....

#### **Analíticos**

- RNA VIH <50 cop/mL Si ☐ No ☐
- RNA VIH <50 cop/mL desde have >1 a1o Si ☐ No ☐
- Linfocitos CD4
- Parámetros bioquímicos, hematológicos y de coagulaci3n (ficha analítica)

#### **Criterios de fragilidad**

(Fried LP, et al. The Journals of Gerontology Series A, Biological sciences and medical sciences. 2001;56(3):M146-56).
